# Supplementary material
Source: publisher figshare collection journal article supplement (https://geolsoc.figshare.com/ndownloader/files/13310834)
Supplement: Supplementary file 1 [file 13310834]

**Values of pH (1:1 extract) and concentration of different metals and arsenic in the sediments studied.**

|  | pH | Fe (%) | Zn (mg/kg) | Pb (mg/kg) | As (mg/kg) | Cu (mg/kg) | Cd (mg/kg) |
| --- | --- | --- | --- | --- | --- | --- | --- |
| S1 0-1 | 6.97 | 45.76 | 1883 | 3701 | 471 | 47 | 4 |
| S1 1-2 | 6.56 | 36.31 | 5888 | 2920 | 275 | 50 | 17 |
| S1 2-3 | 7.25 | 45.81 | 7940 | 2214 | 186 | 42 | 19 |
| S1 3-4 | 7.63 | 52.10 | 7854 | 3195 | 216 | 82 | 15 |
| S1 4-5 | 7.74 | 46.47 | 7112 | 1935 | 87 | 44 | 14 |
| S1 5-6 | 7.68 | 50.15 | 7214 | 1990 | 139 | 38 | 15 |
| S1 6-7 | 7.52 | 52.06 | 11765 | 1779 | 223 | 44 | 13 |
| S1 7-8 | 7.69 | 49.21 | 13780 | 1855 | 201 | 44 | 15 |
| S1 8-9 | 7.57 | 50.95 | 13682 | 2687 | 276 | 42 | 16 |
| S1 9-10 | 7.60 | 53.75 | 11611 | 3483 | 283 | 47 | 20 |
| S2 0-1 | 7.47 | 57.63 | 10029 | 1923 | 248 | 53 | 11 |
| S2 1-2 | 6.74 | 49.67 | 10992 | 2584 | 374 | 50 | 12 |
| S2 2-3 | 7.76 | 46.69 | 10589 | 1653 | 218 | 50 | 10 |
| S2 3-4 | 7.74 | 50.20 | 11952 | 1967 | 407 | 54 | 11 |
| S2 4-5 | 7.72 | 48.80 | 12224 | 2047 | 233 | 49 | 14 |
| S2 5-6 | 7.83 | 51.74 | 11870 | 1778 | 242 | 48 | 12 |
| S2 6-7 | 7.84 | 45.59 | 11200 | 1551 | 179 | 42 | 11 |
| S2 7-8 | 7.72 | 49.02 | 11230 | 1675 | 174 | 41 | 12 |
| S2 8-9 | 7.73 | 49.70 | 11386 | 1485 | 185 | 42 | 14 |
| S2 9-10 | 7.62 | 48.01 | 6700 | 1250 | 180 | 40 | 9 |
| S3 0-1 | 7.79 | 51.41 | 7989 | 1856 | 384 | 48 | 9 |
| S3 1-2 | 7.77 | 43.66 | 8492 | 1354 | 227 | 44 | 10 |
| S3 2-3 | 7.70 | 49.12 | 9484 | 3035 | 192 | 51 | 10 |
| S3 3-4 | 7.80 | 39.45 | 7324 | 1191 | 191 | 45 | 9 |
| S3 4-5 | 7.76 | 38.37 | 5629 | 826 | 213 | 40 | 7 |
| S3 5-6 | 7.73 | 37.05 | 6474 | 707 | 212 | 46 | 9 |
| S3 6-7 | 7.84 | 38.52 | 8982 | 1208 | 144 | 42 | 13 |
| S3 7-8 | 7.70 | 36.33 | 8545 | 1055 | 194 | 36 | 12 |
| S3 8-9 | 7.75 | 31.17 | 9010 | 722 | 183 | 39 | 9 |
| S3 9-10 | 7.75 | 34.58 | 9360 | 837 | 351 | 44 | 11 |
| S4 0-1 | 7.87 | 57.26 | 8201 | 2087 | 451 | 37 | 9 |
| S4 1-2 | 7.54 | 44.74 | 22124 | 1426 | 171 | 41 | 13 |
| S4 2-3 | 7.72 | 37.12 | 8391 | 1135 | 174 | 54 | 12 |
| S4 3-4 | 7.52 | 37.04 | 9016 | 1218 | 180 | 57 | 14 |
| S4 4-5 | 7.38 | 35.01 | 6215 | 810 | 192 | 55 | 8 |
| S4 5-6 | 6.55 | 38.01 | 6300 | 1220 | 180 | 52 | 8 |
| S4 6-7 | 7.84 | 31.04 | 6219 | 746 | 175 | 50 | 9 |
| S4 7-8 | 7.70 | 65.81 | 5188 | 642 | 122 | 44 | 8 |
| S4 8-9 | 7.71 | 30.38 | 5976 | 548 | 133 | 48 | 8 |
| S4 9-10 | 7.73 | 33.46 | 8391 | 938 | 136 | 39 | 9 |
| S5 0-1 | 7.75 | 50.28 | 10890 | 1894 | 421 | 56 | 11 |
| S5 1-2 | 7.53 | 34.67 | 10742 | 1123 | 185 | 52 | 14 |
| S5 2-3 | 7.79 | 33.67 | 8741 | 849 | 206 | 49 | 12 |
| S5 3-4 | 7.5 | 31.54 | 7212 | 962 | 161 | 44 | 10 |
| S5 4-5 | 7.35 | 24.18 | 5994 | 999 | 228 | 50 | 11 |
| S5 5-6 | 7.4 | 32.74 | 5654 | 737 | 164 | 89 | 10 |
| S5 6-7 | 7.55 | 34.17 | 6033 | 724 | 150 | 92 | 9 |
| S5 7-8 | 7.52 | 32.27 | 5629 | 891 | 197 | 94 | 10 |
| S5 8-9 | 7.51 | 34.41 | 8303 | 1292 | 251 | 91 | 13 |
| S5 9-10 | 7.69 | 31.78 | 6683 | 891 | 245 | 83 | 10 |
| S6 0-1 | 6.34 | 60.29 | 10784 | 2304 | 556 | 50 | 10 |
| S6 1-2 | 7.25 | 38.50 | 10541 | 1008 | 406 | 37 | 9 |
| S6 2-3 | 7.45 | 43.71 | 8388 | 1398 | 413 | 45 | 10 |
| S6 3-4 | 7.23 | 42.05 | 7561 | 1366 | 326 | 47 | 9 |
| S6 4-5 | 7.21 | 35.58 | 7232 | 1302 | 454 | 86 | 14 |
| S6 5-6 | 7.54 | 37.67 | 6164 | 1134 | 207 | 92 | 10 |
| S6 6-7 | 7.66 | 34.89 | 6931 | 956 | 141 | 83 | 10 |
| S6 7-8 | 7.7 | 28.49 | 4666 | 540 | 116 | 47 | 9 |
| S6 8-9 | 7.73 | 26.93 | 3947 | 219 | 109 | 41 | 7 |
| S6 9-10 | 7.72 | 1.13 | 5100 | 870 | 2 | 10 | 2 |
| S10 0-1 | 7.15 | 23.64 | 9091 | 1336 | 814 | 95 | 10 |
| S10 1-2 | 7.36 | 26.83 | 9251 | 1179 | 632 | 53 | 14 |
| S10 2-3 | 7.52 | 30.21 | 7797 | 1350 | 380 | 46 | 12 |
| S10 3-4 | 7.68 | 27.50 | 6876 | 928 | 375 | 47 | 12 |
| S10 4-5 | 7.74 | 26.52 | 6876 | 1120 | 331 | 48 | 11 |
| S10 5-6 | 7.61 | 29.24 | 10721 | 1033 | 376 | 47 | 15 |
| S10 6-7 | 7.59 | 29.33 | 8798 | 924 | 287 | 47 | 13 |
| S10 7-8 | 7.54 | 25.64 | 6903 | 666 | 231 | 35 | 11 |
| S10 8-9 | 7.49 | 23.34 | 8403 | 453 | 186 | 27 | 8 |
| S10 9-10 | 7.39 | 22.69 | 9074 | 572 | 248 | 30 | 8 |
| S11 0-1 | 7.17 | 27.37 | 7820 | 880 | 587 | 90 | 10 |
| S11 1-2 | 7.48 | 22.34 | 5076 | 670 | 283 | 42 | 8 |
| S11 2-3 | 7.61 | 28.01 | 6032 | 700 | 320 | 40 | 11 |
| S11 3-4 | 7.55 | 29.01 | 6150 | 750 | 350 | 47 | 11 |
| S11 4-5 | 7.65 | 28.50 | 7315 | 1250 | 400 | 41 | 15 |
| S11 5-6 | 7.71 | 27.01 | 7700 | 3000 | 394 | 48 | 11 |
| S11 6-7 | 7.78 | 24.49 | 8815 | 1494 | 309 | 38 | 11 |
| S11 7-8 | 7.76 | 24.85 | 8946 | 964 | 387 | 59 | 14 |
| S11 8-9 | 7.73 | 23.81 | 8929 | 982 | 656 | 81 | 16 |
| S11 9-10 | 7.68 | 23.32 | 7775 | 2716 | 660 | 91 | 13 |
| S12 0-1 | 6.77 | 29.79 | 9930 | 2021 | 763 | 67 | 12 |
| S12 1-2 | 7.11 | 34.01 | 9718 | 1152 | 324 | 50 | 12 |
| S12 2-3 | 7.42 | 30.39 | 7843 | 1098 | 312 | 50 | 11 |
| S12 3-4 | 7.58 | 26.84 | 7952 | 1193 | 295 | 56 | 9 |
| S12 4-5 | 7.57 | 30.33 | 6849 | 1037 | 289 | 54 | 10 |
| S12 5-6 | 7.5 | 34.79 | 7952 | 2207 | 657 | 86 | 16 |
| S12 6-7 | 7.52 | 28.00 | 9937 | 2502 | 617 | 83 | 22 |
| S12 7-8 | 7.48 | 27.56 | 6890 | 2156 | 350 | 72 | 15 |
| S12 8-9 | 7.62 | 23.76 | 7605 | 1459 | 578 | 80 | 12 |
| S12 9-10 | 7.70 | 32.32 | 5877 | 754 | 362 | 91 | 12 |
| S16 0-1 | 6.18 | 33.04 | 6803 | 1735 | 572 | 77 | 6 |
| S16 1-2 | 6.55 | 30.86 | 12536 | 2305 | 700 | 63 | 16 |
| S16 2-3 | 7.03 | 27.05 | 11194 | 1096 | 279 | 41 | 17 |
| S16 3-4 | 7.50 | 28.10 | 8721 | 935 | 276 | 34 | 11 |
| S16 4-5 | 7.52 | 31.10 | 9718 | 1030 | 272 | 47 | 14 |
| S16 5-6 | 7.49 | 27.97 | 8679 | 2377 | 521 | 70 | 14 |
| S16 6-7 | 7.51 | 31.28 | 7820 | 2610 | 216 | 72 | 15 |
| S16 7-8 | 7.52 | 29.50 | 8563 | 2479 | 328 | 62 | 17 |
| S16 8-9 | 7.64 | 28.33 | 8499 | 4245 | 318 | 70 | 17 |
| S16 9-10 | 7.71 | 23.52 | 11289 | 5536 | 665 | 102 | 23 |
| S18 0-1 | 7.01 | 22.50 | 8759 | 1422 | 325 | 78 | 22 |
| S18 1-2 | 7.62 | 32.11 | 8845 | 1715 | 303 | 80 | 22 |
| S18 2-3 | 7.69 | 29.31 | 7937 | 1387 | 357 | 61 | 20 |
| S18 3-4 | 7.45 | 28.49 | 8067 | 1303 | 337 | 74 | 17 |
| S18 4-5 | 7.41 | 11.01 | 2999 | 1250 | 150 | 37 | 16 |
| S18 5-6 | 7.51 | 25.94 | 10969 | 1930 | 383 | 72 | 26 |
| S18 6-7 | 7.72 | 25.34 | 9327 | 1537 | 363 | 64 | 25 |
| S18 7-8 | 7.70 | 2.37 | 462 | 1100 | 78 | 60 | 17 |
| S18 8-9 | 7.65 | 10.01 | 8633 | 2298 | 60 | 46 | 25 |
| S18 9-10 | 7.62 | 7.01 | 5320 | 1425 | 54 | 49 | 21 |
| S21 0-1 | 7.54 | 25.21 | 7402 | 580 | 330 | 71 | 19 |
| S21 1-2 | 7.68 | 22.97 | 5865 | 169 | 211 | 52 | 19 |
| S21 2-3 | 7.71 | 20.40 | 9095 | 95 | 140 | 38 | 16 |
| S21 3-4 | 7.48 | 23.34 | 4381 | 99 | 95 | 23 | 17 |
| S21 4-5 | 7.63 | 24.19 | 7123 | 92 | 132 | 29 | 22 |
| S21 5-6 | 7.72 | 24.98 | 8061 | 615 | 344 | 56 | 26 |
| S21 6-7 | 7.51 | 22.70 | 8412 | 547 | 301 | 69 | 31 |
| S21 7-8 | 7.73 | 24.82 | 8301 | 1267 | 475 | 67 | 31 |
| S21 8-9 | 7.70 | 22.67 | 8624 | 1101 | 446 | 70 | 37 |
| S21 9-10 | 7.46 | 4.45 | 6594 | 940 | 51 | 32 | 28 |
